# Supplementary material for: Dual PDE4/10 Inhibition Restores CREB1 Function and Enhances Neuronal Resilience in Alzheimer's Disease
Source: Research Square preprint supplement (doi:10.21203/rs.3.rs-6907913/v1), 2025-06-23
Supplement: Supplementary file 1 [file 6ad313e1d669ff901c68ff08.pdf]

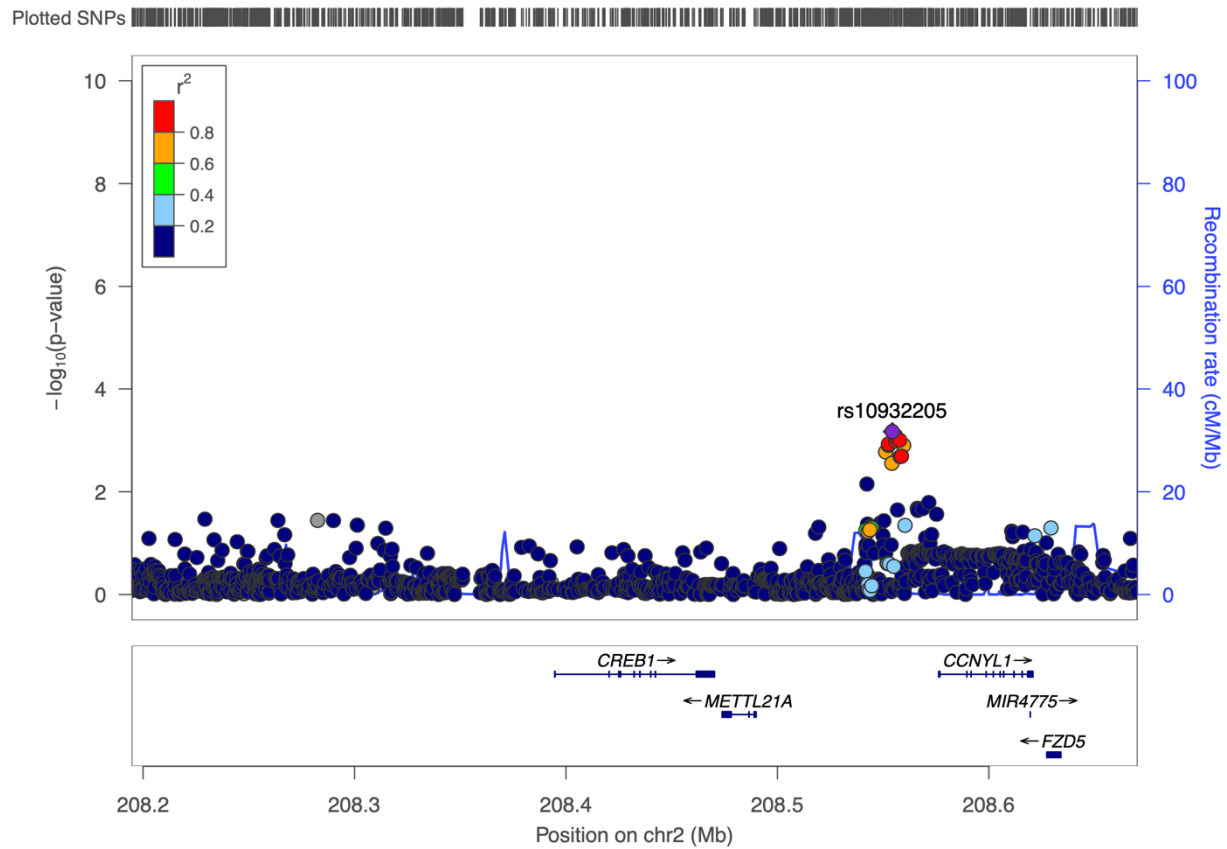

**Fig.S1.** The regional AD GWAS association plot for the CREB1 locus. The x-axis represents the position at chr2: 208194615-208670284 (hg19). The y-axis shows  $-\log_{10}(p\text{-value})$ . Each dot represents a genetic variant within this region, with the minimum P-value SNP rs10932205 ( $P = 6.75 \times 10^{-4}$ ) highlighted in purple.

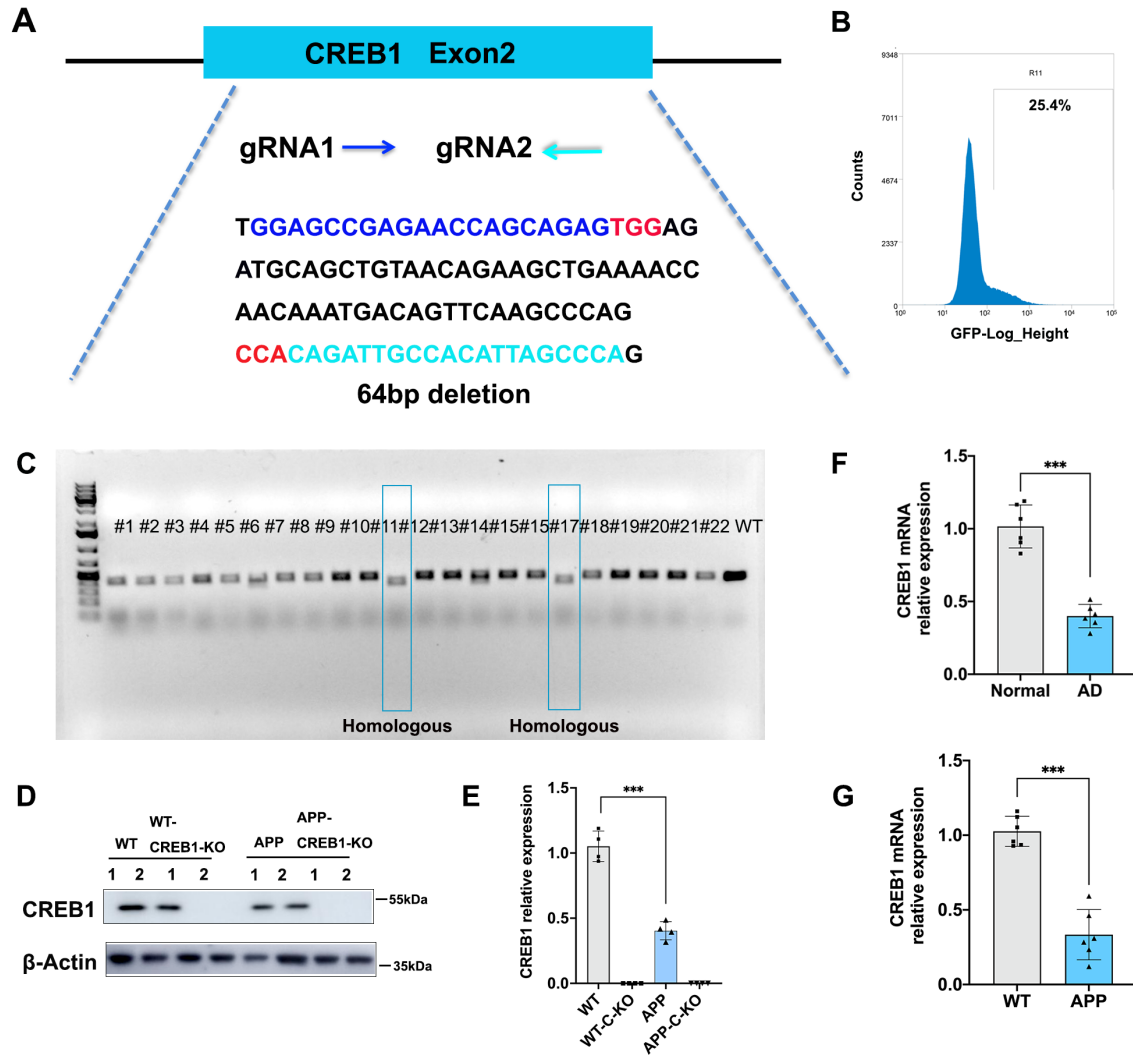

**Fig.S2. (A).** Guide RNA design for the generation of CREB1-KO iPSC line. **(B).** Fluorescence-activated cell sorting (FACS) to isolate GFP-positive (transfected) cells. **(C).** Agarose gel electrophoresis shows the homozygous CREB1 KO clones in WT (clone1-11), and APP iPSC lines (clone12-22). **(D).** Western blot shows undetectable levels of CREB1 protein expression in the WT-CREB1-KO and APP-CREB1-KO iPSC lines. **(E).** RT-qPCR quantification of CREB1 mRNA relative expression in the prefrontal cortex of normal individuals and AD patients (n=6). **(F).** RT-qPCR quantification of CREB1 mRNA relative expression in WT or APP iPSC-derived human cortical neurons (n=6). Data are presented as the mean  $\pm$  SEM, p values were determined by one-way ANOVA followed by Tukey's post-hoc analysis, and two-tailed unpaired Student's t-test, \*\*\*p < 0.001. The number of samples for each group is indicated individually on each graph.

| No.  | FDX  | CERAD | BRAAK | AGE | SEX | PMD |
|------|------|-------|-------|-----|-----|-----|
| 2259 | Ctrl | 0     | 2     | 78  | F   | 21  |
| 2267 | Ctrl | 0     | 1     | 84  | F   | 31  |
| 2314 | Ctrl | 0     | 2     | 85  | M   | 24  |
| 2527 | Ctrl | 0     | 2     | 91  | F   | 15  |
| 2543 | Ctrl | 0     | 1     | 87  | M   | 18  |
| 2562 | Ctrl | 0     | 2     | 80  | M   | 11  |
| 2734 | AD   | B     | 5     | 82  | F   | 56  |
| 2752 | AD   | C     | 6     | 76  | F   | 36  |
| 2776 | AD   | C     | 6     | 92  | M   | 42  |
| 2831 | AD   | B     | 6     | 83  | M   | 47  |
| 2844 | AD   | C     | 5     | 85  | F   | 34  |
| 2861 | AD   | B     | 5     | 77  | F   | 43  |

**Table S1** Human postmortem AD brain tissue information. Formalin-fixed paraffin-embedded (FFPE) tissue sections from 12 human brains were analyzed, including 6 controls, 6 AD cases, and 10  $\mu$ m thickness. Brain research number (No.), Final Diagnosis (FDX), Consortium to Establish a Registry for Alzheimer's Disease score (CERAD), Braak neurofibrillary tangle stage (BRAAK), Age at death (AGE), Sex (SEX), and Postmortem Delay (PMD).

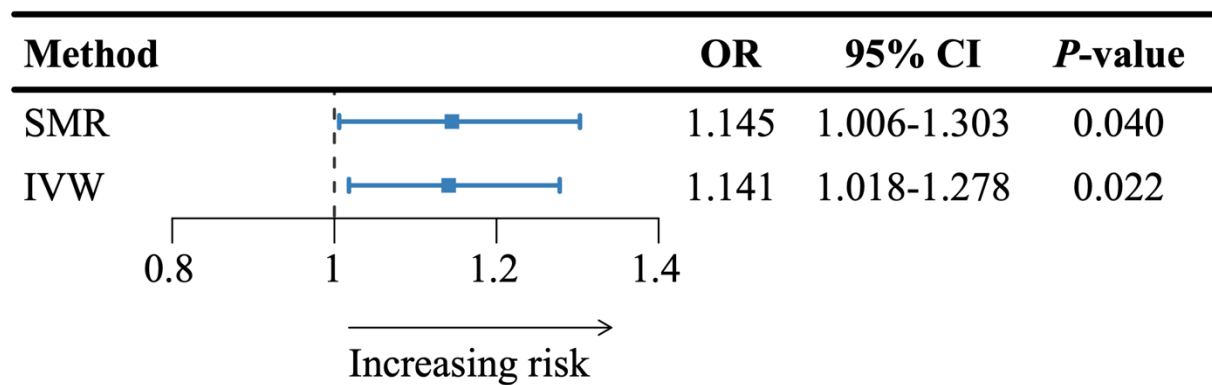

**Table S2** The forest plot for the Mendelian randomization association between genetically predicted *PED4A* gene expression and AD risk.
